# Measuring mosquito-borne viral suitability in Myanmar and implications for local Zika virus transmission

1

Perez PN<sup>a,b</sup>, Obolski U<sup>d</sup>, Alcantara LCJ<sup>c</sup>, Maia de Lima M<sup>c</sup>, Ashley EA<sup>e,g</sup>, Smithuis F<sup>e,f,g</sup>, Horby P<sup>f</sup>, Maude RJ<sup>f,g,h,i</sup>, Zaw L<sup>j</sup>, Kyaw AM<sup>j</sup>, Lourenço J<sup>d</sup>

## Affiliations:

<sup>a</sup> Department of Global Health and Tropical Medicine, University of Oxford, UK

<sup>b</sup> Department of Infectious Disease Epidemiology, Imperial College, London, UK

<sup>c</sup> Laboratory of Haematology, Genetics and Computational Biology, FIOCRUZ, Brazil

<sup>d</sup> Department of Zoology, University of Oxford, UK

<sup>e</sup> Myanmar-Oxford Clinical Research Unit, Yangon

<sup>f</sup> Nuffield Department of Medicine, University of Oxford, UK

<sup>g</sup> Centre for Tropical Medicine and Global Health, Nuffield Department of Medicine, University of Oxford, UK

<sup>h</sup> Mahidol-Oxford Tropical Medicine Research Unit, Faculty of Tropical Medicine, Mahidol University, Thailand

<sup>i</sup> Harvard TH Chan School of Public Health, Harvard University, Boston, USA

<sup>j</sup> Myanmar Ministry of Health and Sports

## Correspondence to:

Pablo N Perez-Guzman (p.perez-guzman@imperial.ac.uk)

## Abstract

INTRODUCTION: In South East Asia, mosquito-borne viruses (MBVs) have long been a cause of high disease burden and significant economic costs. While in some SEA countries the epidemiology of MBVs is spatio-temporally well characterised and understood, in others such as Myanmar our understanding is largely incomplete. MATERIALS AND METHODS: Here, we use a simple mathematical approach to estimate a climate-driven suitability index aiming to better characterise the intrinsic, spatio-temporal potential of MBVs in Myanmar. RESULTS: Results show that the timing and amplitude of the natural oscillations of our suitability index are highly informative for the temporal patterns of DENV case counts at the country level, and a mosquito-abundance measure at a city level. When projected at fine spatial scales, the suitability index suggests that the time period of highest MBV transmission potential is between June and October independently of geographical location. Higher potential is nonetheless found along the middle axis of the country and in particular in the southern corridor of international borders with Thailand. DISCUSSION: This research complements and expands our current understanding of MBV transmission potential in Myanmar, by identifying key spatial heterogeneities and temporal windows of importance for surveillance and control. We discuss our findings in the context of Zika virus given its recent worldwide emergence, public health impact, and current lack of information on its epidemiology and transmission potential in Myanmar. The proposed suitability index here demonstrated is applicable to other regions of the world for which surveillance data is missing, either due to lack of resources or absence of an MBV of interest.

## Introduction

Common mosquito-borne viruses (MBVs) of global health concern include the dengue (DENV), chikungunya (CHIKV), Zika (ZIKV), yellow fever (YFV), Rift Valley fever (RVFV), West-Nile (WNV) and Japanese encephalitis (JEV) viruses. Due to ongoing globalization and climatic trends that favour the establishment of vectors and movement of infectious hosts, these pathogens are becoming increasingly detrimental for human public health [1]–[3].

The evolutionary and host-pathogen history of MBVs is vastly diverse, but the population biology of these viruses shares one unifying characteristic: their epidemiological dynamics and epidemic behaviour is inherently linked to the underlying population dynamics of their vector-species. Mosquito-population dynamics are known to be dictated by a wide range of factors, such as climate, altitude, population density of humans or other animals, air or waste pollution levels, and natural or artificial water reservoirs [4]–[7]. While most of these factors can dictate absolute population sizes (carrying capacity), seasonal oscillations are largely driven by natural climate variations.

49 South East Asia (SEA) is the most densely populated region of the world and has experienced rapid urbanization in  
 50 the past century. Such demographic factors and tropical climate are believed to be the main drivers of the success of  
 51 *Aedes* mosquitoes in the region, the main genus for the transmission of MBVs such as DENV, CHIKV and ZIKV.  
 52 Historically, surveillance of MBVs has been highly heterogeneous in the region. For instance, a few countries such  
 53 as Vietnam, Thailand and Singapore often serve as global references for DENV epidemiology, reporting spatio-  
 54 temporal epidemiological and genetic data spanning several decades [8], [9]. Other countries, such as Myanmar,  
 55 report epidemiological data at lower spatio-temporal resolutions [10]–[12]. For instance, published DENV case  
 56 counts over time are reported at national level with total counts per year at the state level, but spatio-temporal  
 57 data at the district or lower levels is not freely available. In the context of countries with incomplete data coverage  
 58 for a robust understanding of the local epidemiological determinants and epidemic potential of MBVs,  
 59 mathematical frameworks, and in particular dynamic models, are essential to close the gaps in knowledge.

60 Recently, we have developed and applied a climate-driven mathematical framework to study epidemics of MBVs  
 61 such as DENV [13], [14] and ZIKV [15]. The success of this framework stems from its data-driven approach,  
 62 including temporal climatic series used to parameterise both vector and viral variables under mathematical  
 63 relationships derived from experimental studies. The reliance on local climatic variables as its main input makes  
 64 the framework general enough to be applied to different geo-locations. Here we translate our experience with this  
 65 framework to introduce an MBV suitability index, which we apply to the context of Myanmar. With it, we estimate  
 66 spatio-temporal patterns of suitability across the country, validating it against existing but incomplete data. Our  
 67 results contribute to a better understanding of Myanmar's MBV transmission potential in both time and space. We  
 68 discuss the public health and control implications of our findings both generally for MBVs and in particular for  
 69 ZIKV.

70

## 71 **Methods**

72 Our approach develops from a climate-driven, mosquito-borne mathematical model of viral transmission that has  
 73 been successfully applied to three MBV epidemics: for the 2012 dengue serotype 1 outbreak in the island of  
 74 Madeira (Portugal) [13], the 2014 dengue serotype 4 outbreak in Rio de Janeiro (Brazil) [14] and the 2015-2017  
 75 ZIKV outbreak in Feira de Santana (Brazil) [15]. In these case studies, given the availability of reported epidemic  
 76 curves at appropriate spatio-temporal scales, deterministic simulations were used with a Markov chain Monte  
 77 Carlo fitting approach to derive key local eco-epidemiological parameters, allowing of the estimation of the basic  
 78 reproductive number ( $R_0$ ) and effective reproductive number ( $Re$ ).

79 In the context of Myanmar and the lack of reported case counts at the subnational level, we addressed the  
 80 potential for MBVs transmission by focusing on the model's equation for  $R_0$  [15], a similar starting point of a  
 81 recent and successful strategy implemented in the context of YFV in the African continent [16].  $R_0$  is the sum of  
 82 the transmission potential of each adult female mosquito per human, across the total number of female  
 83 mosquitoes per human ( $M$ ), in a totally susceptible human population. Hence,  $R_0$  can be expressed as the product  
 84 of  $M$  with each individual mosquito transmission potential  $P(u,t)$ :

$$R_{0(u,t)} = M \frac{a_{(u)}^v a_{(u)}^v \phi_{(t)}^{v \rightarrow h} \phi_{(t)}^{h \rightarrow v} \gamma_{(t)}^v \gamma^h}{\mu_{(u,t)}^v (\sigma^h + \mu^h) (\gamma^h + \mu^h) (\gamma_{(t)}^v + \mu_{(u,t)}^v)} = M P_{(u,t)}$$

$$P_{(u,t)} = \frac{a_{(u)}^v a_{(u)}^v \phi_{(t)}^{v \rightarrow h} \phi_{(t)}^{h \rightarrow v} \gamma_{(t)}^v \gamma^h}{\mu_{(u,t)}^v (\sigma^h + \mu^h) (\gamma^h + \mu^h) (\gamma_{(t)}^v + \mu_{(u,t)}^v)}$$

85

86 The  $R_0$  expression is dependent on time-varying humidity ( $u$ ) and temperature ( $t$ );  $M$  is the number of adult  
 87 female mosquitoes per human ( $V/N$ , with  $N$  the human population size and  $V$  the adult female mosquito  
 88 population size);  $a^v(u)$  is the mosquito biting rate, dependent on humidity;  $\Phi^{v-h}(t)$  is the probability of transmission  
 89 of the virus by infected-mosquito to human, per bite, dependent on temperature;  $\Phi^{h-v}$  is the probability of

90 transmission from infected-human to mosquito, per bite;  $1/\gamma^v(t)$  is the extrinsic incubation period, dependent on  
91 temperature;  $1/\gamma^h$  is the intrinsic incubation period;  $1/\mu^v(u,t)$  is the mosquito life-span, dependent on humidity  
92 and temperature;  $1/\sigma^h$  is the human infectious period; and  $1/\mu^h$  is the human life-span. Each of the climate  
93 dependent functions was previously determined by laboratory estimates of entomological data (equations 20-37,  
94 [15]).

95 The individual-mosquito transmission potential  $P(u,t)$  is a positive number, with  $P>1$  indicating the capacity of a  
96 single adult female mosquito to contribute to epidemic expansion, and  $P<1$  indicating otherwise. However, this  
97 threshold around 1 does not necessarily equate to the classic epidemic threshold of  $R_0>1$  (or  $Re>1$ ), since  $P(u,t)$   
98 critically ignores the total number of female mosquitoes per human ( $M$ ). In other words, an epidemic threshold  
99 may be reached, for instance, with  $P<1$  if  $M>>1$ . Here, we argue and demonstrate that  $P(u,t)$  holds critical  
100 information on transmission seasonality (timing) and amplitude (relative epidemic potential between seasons and  
101 regions), both driven by the inherent climatic variables affecting viral and entomological factors. We denote  $P(u,t)$   
102 as the *mosquito-viral suitability index*  $P$ , using a complementary terminology to existing *vector suitability* indices  
103 which more generally consider entomological factors and / or vector-population sizes [17]-[19]. As seen above,  
104  $P(u,t)$  is a complex expression containing human, entomological and viral factors, and can thus be parametrized for  
105 any species of virus, host or vector, and estimated for any region for which humidity and temperature are  
106 available.

107 While some parameters used to calculate  $P$  can be quantified through known constant values, others follow  
108 mathematical expressions that depend on three scaling factors,  $\alpha$ ,  $\rho$  and  $\eta$ , that are used to modulate the  
109 baseline relationships between climatic variables and entomological parameters:

$$\begin{aligned}\gamma_{(t)}^v &= \alpha \gamma_{(t)}^{v*} \\ \mu_{(u,t)}^v &= \eta \mu_{(t)}^v [1 + \mu_{(u)}^v]^\rho \\ a_{(u)}^v &= a [1 + a_{(u)}^{v*}]^\rho\end{aligned}$$

110  
111 Here,  $a$  is the baseline biting rate, and the terms marked with  $*$  are the actual functions defined in the empirical  
112 studies, which can be found in Materials and Methods of Lourenco et al. [15]. The multiplicative coefficients  $\eta$  and  
113  $\alpha$  are used in the temperature dependent components of the adult mosquito mortality and incubation period,  
114 respectively. Their inclusion does not alter the relative effect of temperature variation on the entomological  
115 parameters *per se*, but allows for the parameter's baselines to be different from the ideal laboratory conditions of  
116 the original research (e.g. [20]). In practice, the effect of temperature on these parameters can be considered to  
117 be the same as observed under laboratory conditions if  $\eta\sim 1$  and  $\alpha\sim 1$ , or weaker if  $<1$  or higher if  $>1$ . The  
118 exponential parameter  $\rho$  allows instead to modulate the strength by which adult mosquito mortality and biting  
119 rate react to deviations from local mean humidity. In practice, the effect of humidity can be switched off when  $\rho$   
120 tends to 0 and made stronger when  $\rho >1$ . For a discussion on possible biological factors that may justify these  
121 factors divergence from 1 please refer to the original description of the method [13] and in a separate study by  
122 Brady and colleagues [21].

123 Fitting exercises to MBV epidemic curves that would allow for quantitative estimations of scaling factors  $\alpha$ ,  $\rho$  and  
124  $\eta$  were not possible for Myanmar due to the lack of reported cases at appropriate spatio-temporal scales. To  
125 overcome this limitation, we ran a parameter sweep on the three factors in the range 0-10, and drew the  
126 combination of three values that would derive a yearly mean life-span of adult mosquitoes of  $\sim 9$  days and an  
127 extrinsic incubation period of  $\sim 5$  days. These heuristics are based on prior knowledge for ZIKV and DENV  
128 transmission estimations with the same model in three different regions [13]-[15], which are themselves  
129 informed by reported biological ranges for *Aedes* mosquitoes [15], [21]-[24]. Please refer to the *Data* section for a  
130 description on the epidemiological and climate time series used in this study and the section *Parameters specific*  
131 *to Myanmar* section for all subnational values found and used for the scaling factors  $\alpha$ ,  $\rho$  and  $\eta$ . Constant  
132 parameter values used were: human lifespan of 64 years [25], human infectious period of 5.8 days, biting rate of

133 0.25 per day, human incubation period of 5.9 days and the infected-human to mosquito probability of  
 134 transmission per bite of 0.5 (as previously modelled [15]).

135 **Results**

136 We first tested the index P in the context of publicly available DENV case count data at the national-level for the  
 137 period between 1996 and 2001 [12]. For this, we estimated P for each district using available local climatic data  
 138 (2015-2016), further aggregating and averaging P across all districts of the country and per month (Figures 1 A1-  
 139 2). While the epidemiological and climatic data available for the analysis were from different time periods, we  
 140 found that the estimated P for both 2015 and 2016 presented seasonal fluctuations in sync with mean DENV  
 141 counts from multiple years (1996-2001). The dynamics of P at the country level further presented key signatures in  
 142 accordance to Myanmar's climatic seasons. Namely, (i) a sharp increase in transmission potential during May and  
 143 June, coincident with the onset of the rainy season (Jun - Oct), and (ii) a trough in potential in the middle of the  
 144 hot and dry season (Mar - May). A linear correlation between mean DENV counts (1996-2001) and mean index P  
 145 (2015-2016) showed that ~76% of the variation in case count dynamics could be explained by the index with  
 146 statistical significance ( $p$ -value= $2.4 \times 10^{-4}$ , Figure 1 B3).

147

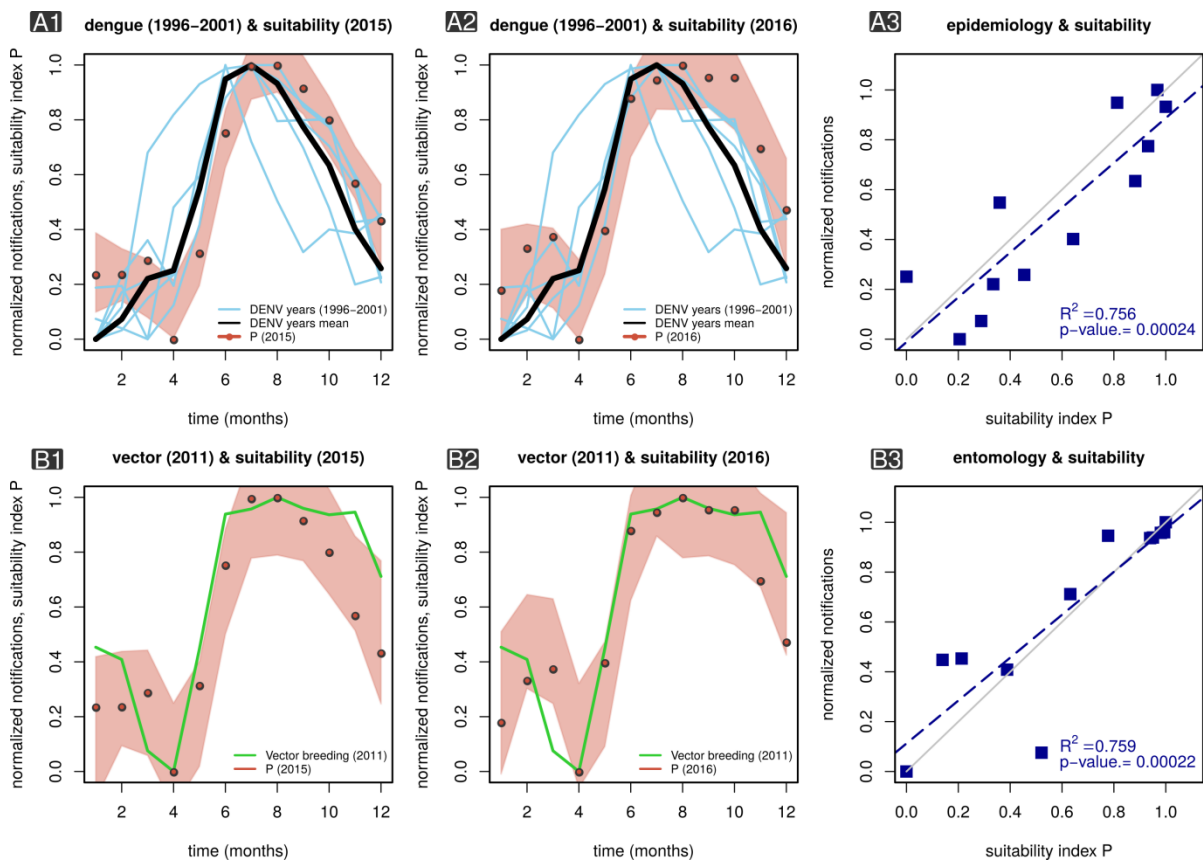

148

149 **Figure 1 - MBV suitability index P and ento-epidemiological time series in Myanmar.** Panel A1 presents the mean estimated index P  
 150 across Myanmar for 2015 (red dots, locally weighted smoothing bounds within red area) superimposed on monthly case counts of  
 151 DENV for several transmission seasons (1996-2001, blue lines) in Myanmar. The black line is the mean DENV case counts 1996-2001.  
 152 Panel A2 is the same as B1 but with P estimated for 2016. Panel A3 is a linear regression of mean DENV case counts (1996-2001)  
 153 versus the mean index P (2015-2016) as displayed in panels A1-2. Panel B1 presents the mean estimated index P in Yangon for 2015  
 154 (red dots, locally weighted smoothing bounds within red area) superimposed on monthly number of major breeding containers in  
 155 2011 (green lines) for Yangon. Panel B2 is the same as B1 but with P estimated for 2016. Panel B3 is a linear regression of major  
 156 breeding sites (2011) versus the mean index P (2015-2016) as displayed in panels B1-2.

157

158 Because we propose the index P as a measure of suitability independent of the total number of (female)  
159 mosquitoes, it is critical to have empirical support on whether its oscillatory behaviour (timing and amplitude)  
160 correlates with local measures of mosquito population size. Studies including mosquito surveys in Myanmar are  
161 scarce in the literature, mostly targeting vectors related to malaria transmission and focusing on their spatial  
162 distribution and species diversity (e.g. [26], [27], [28]). Here, we use data collected in a study of *Aedes aegypti*  
163 abundance in Yangon for the year of 2011 [29]. As far as we know, this is the only study with larval indices  
164 measured monthly over the period of at least one year. We compared the published data with our estimations of  
165 index P for Yangon in 2015 and 2016 (Figures 1 B1-2). As previously shown for DENV counts (Figure 1 A1-2), the  
166 seasonal fluctuations of index P and larval indices were synchronous in time. A linear correlation between  
167 Yangon's larval indices (2011) and index P (2015) showed that ~76% of the variation in mosquito abundance  
168 measure, a proxy for adult mosquito population size, could be explained by the index P with statistical significance  
169 ( $p$ -value= $2.2 \times 10^{-4}$ , Figure 1 C3).

170 As in other places of the world presenting endemicity for MBVs, Myanmar is likely to present significant  
171 heterogeneities between districts (and states) in terms of suitability (transmission potential). Apart from studies  
172 reporting differences in the total number of MBV case counts across the country, an assessment of suitability in  
173 space has not been previously done for Myanmar. Since our results suggested that the index P contains  
174 information on the timing and amplitude of observed DENV counts and mosquito population size (Figure 1), we  
175 explored the spatial variation of index P across the country.

176 We looked at the spatial variation of the index P (2015-2016), focusing on its average within the cool dry (Nov -  
177 Feb), hot dry (Mar - May) and wet seasons (Jun - Oct) (Figure 2A), and found significant differences between  
178 seasons. Namely, the cool dry season presented a generally lower index P across space, at a time when climatic  
179 conditions are expected to be less favorable for the mosquito and therefore for suitability. In contrast, the wet  
180 season presented the highest index P across space. Importantly, the latter occurs in the same time period (Jun -  
181 Oct) in which DENV counts and mosquito abundance measures also peak. Significant variation within each season  
182 was also observed, with the cool and dry season presenting more homogeneous suitability across space (standard  
183 deviation, SD=3.86) and the wet season presenting the most heterogeneous suitability (SD=4.17).

184 We next attempted to correlate the spatial distribution of suitability with local mosquito abundance measures and  
185 MBV case counts. However, we found no data with spatial resolution for abundance, and found only DENV counts  
186 at the level of Myanmar's states for the year 2015 as reported by the Ministry of Health and Sports [30]. Similarly  
187 to the approach applied for districts, we calculated the yearly average index P per state using climate data for both  
188 2015 and 2016 (Figure 2B) and compared its spatial distribution with DENV counts per state for 2015 (Figure 2C).  
189 States presenting higher average suitability were located across the centre of the country, but particularly in the  
190 south, sharing a border with Thailand. The distribution of DENV counts presented a generally similar spatial  
191 signature co-localised in the centre and south of the country (Figure 2C). The Pearson's correlation between mean  
192 yearly suitability and yearly DENV counts of the state-based two maps was 0.56 ( $p$ -value=0.033).

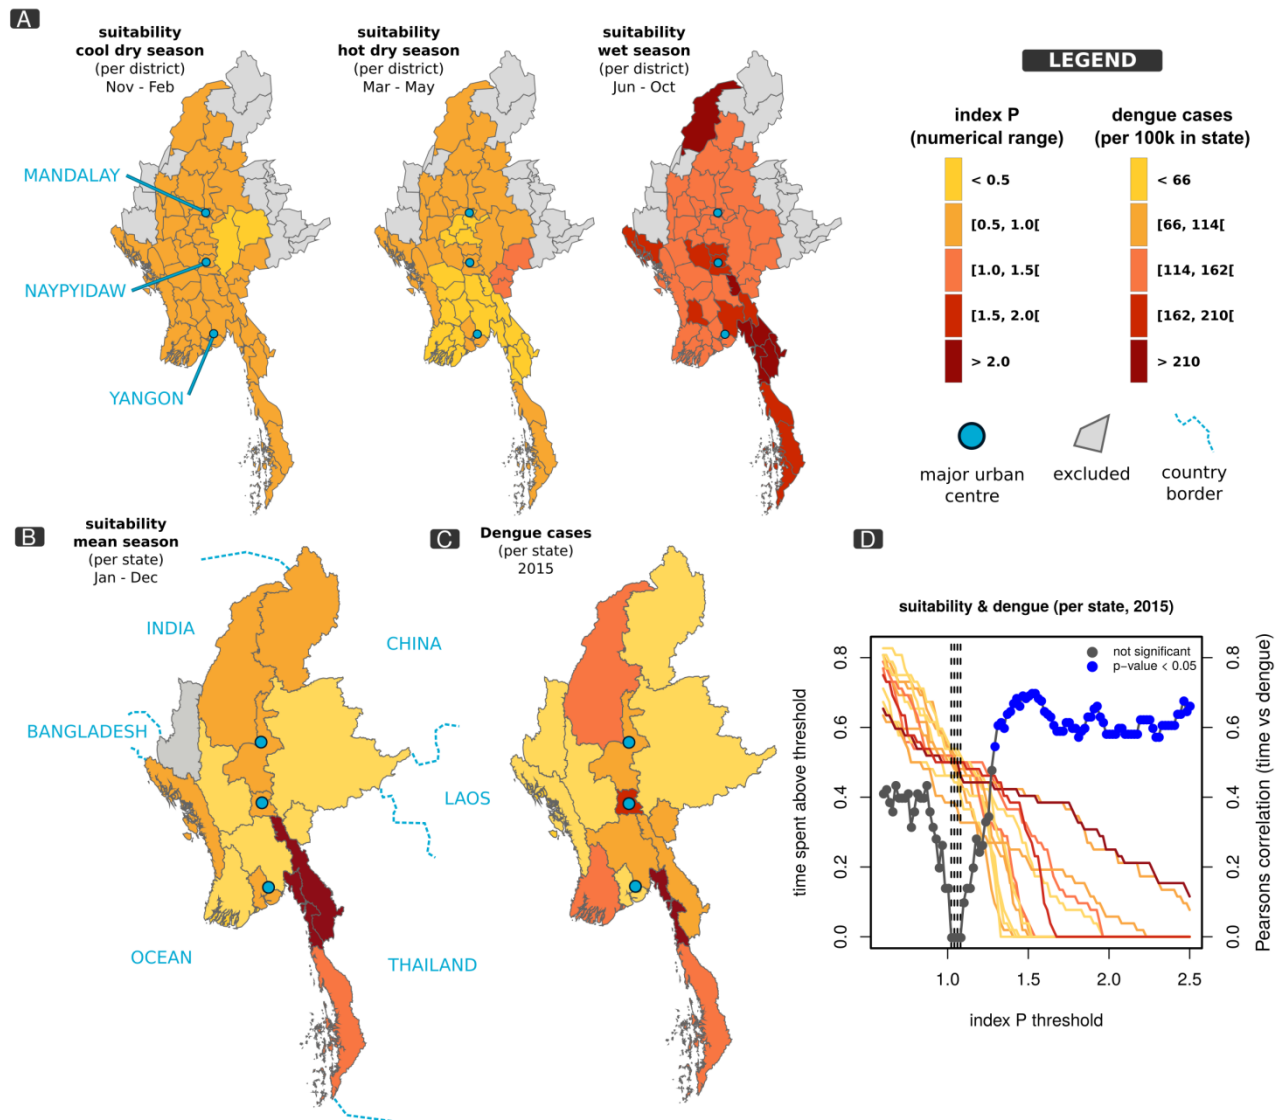

193  
194  
195 **Figure 2 - MBV suitability index P and spatial distribution of epidemiological data in Myanmar.** Panel A shows maps of Myanmar  
196 coloured according to mean index P per district in different seasons of the year (as labelled in each map). Panel B presents the yearly  
197 mean index P per state in 2015 with borders of neighboring countries (named) shown in light blue. Panel C presents the number of  
198 DENV cases per state in 2015. Panel D presents a sensitivity exercise showing the critical index P (~1.5) for which the spatial  
199 distributions of dengue cases and mean index P are most correlated in 2015. Colored lines show the amount of time (T) each state  
200 spends with index P above a certain threshold (colors related to 2015 DENV case counts, as in map C). Points present Pearson's  
201 correlation coefficient between T and dengue case counts with significant correlations in blue. Dashed vertical lines signal the T  
202 values for which the minimum (no) correlation is found. In all panels: all model parameters as described in Methods section, except  
for  $\alpha$ ,  $\rho$  and  $\eta$  as described in section *Parameters specific to Myanmar*.

203  
204 Again, since we propose the index P as a measure of suitability independent of the number of (female)  
205 mosquitoes per human (M), a typical threshold of  $P=1$  may not be adequate to speculate on local epidemic  
206 potential, given that an  $R_0 > 1$  can be achieved with  $P < 1$  and  $M > 1$  (although the results from Figure 1 suggest that  
207 both the timing and amplitude of P are highly informative). We hypothesized that the time spent above a certain  
208 value (threshold) of suitability could be a better proxy for local, yearly epidemic potential. A sensitivity analysis  
209 was performed for 2015, the only year for which we had both climate input (index P) and DENV counts, with the  
210 intent of searching for the threshold of P that best explained the observed spatial distribution of DENV counts per  
211 state. We set 100 thresholds from 0.5 to 2.5 and measured the amount of time (T) the index P remained above  
212 each threshold in each state in 2015. Measures of T per state were used to calculate Pearson's correlation with

213 DENV counts per state (Figure 2D). We found that small thresholds ( $P < 1$ ) had non-significant and low correlations  
214 between yearly cases and mean yearly suitability, while intermediate-to-high thresholds ( $P > 1.35$ ) had significant  
215 and high correlations. The minimum correlation was found just above  $P = 1$  (dashed vertical lines in Figure 2D),  
216 when states are seen to spend equal amount of time  $T$  above that threshold in a year (seen by measures of  $T$  per  
217 state coloured according to DENV counts as in map's legend, Figure 2D). These results show the amount of time a  
218 region spends with suitability above a typical threshold of 1 is the least optimal to predict yearly epidemic  
219 potential and that in Myanmar's epidemiological context higher thresholds are more informative.

## 220

## 221 Discussion

222 In this study, we were able to demonstrate that our measure for mosquito-borne viral suitability is informative in  
223 the context of Myanmar, despite the lack of ento-epidemiological datasets with high spatio-temporal resolution.  
224 By estimating suitability through climate variables and known ento-epidemiological parameters, we were able to  
225 project mosquito-borne virus (MBV) suitability at the district level, a resolution for which epidemiological data and  
226 mosquito abundance measures are not generally available. Here, we discuss the national and subnational public  
227 health and control implications for MBVs in the context of our projections.

228 At both the national and subnational levels, the wet season (Jun - Oct) was estimated to have the highest potential  
229 for MBVs transmission, in accordance with reported epidemiological time series. Since this was observed across  
230 Myanmar, it suggests that the epidemic potential of each district peaks during this period independently of their  
231 spatial location. In contrast, the hot and dry season (Mar - May) presented the lowest potential, also consistently  
232 across Myanmar, in accordance with what are known to be less favourable climate conditions for the vector. We  
233 therefore argue that in Myanmar, adequate surveillance and health care delivery resources should be fully  
234 operational by the end of the hot and dry season (May), in anticipation for the increase in MBVs case counts that  
235 is likely to occur in the following months. A similar argument can be used for vector control strategies in Myanmar,  
236 which should have maximal impact before the onset of the wet season, when mosquitoes encounter less  
237 favourable climate conditions and have smaller population sizes.

238 We also identified important spatial variations in MBV suitability across Myanmar. For instance, the highest  
239 potential was found primarily in the southern rural districts bordering with Thailand, and to a lesser degree across  
240 the middle of the country where the 3 major urban centres are located. Importantly, this estimated potential was  
241 highly correlated with DENV cases counts at the state level, although the lack of epidemiological data at such  
242 spatial resolution precluded us from verifying if our estimations at the district level fitted local counts. It may be  
243 tempting to speculate that the higher number of DENV counts in the south is a consequence of inflow of cases  
244 from Thailand (a highly endemic country). Critically, however, the estimated suitability in the south of Myanmar, in  
245 particular during the wet season, suggests for the first time that the observed higher incidence is driven by a local,  
246 higher intrinsic potential for MBVs transmission. Although management of case importation should be part of any  
247 national plan, it is clear that reducing suitability in the southern region of the country will be critical to control  
248 MBVs, for which vector control strategies should be effective.

249 Epidemiological models are useful tools to gauge the burden of a disease of interest, assess transmission  
250 potential, mosquito suitability, prompt surveillance efforts, inform better public health policies and highlight areas  
251 for pressing research. Such approaches are even more critical in epidemiological settings characterized by the  
252 absence of sustained surveillance or for pathogens which tend to have mild or asymptomatic pathology. The  
253 method here introduced requires solely climatic data and basic ento-epidemiological assumptions for which  
254 literature support is available. We foresee the usefulness and applicability of the index  $P$  for other regions of the  
255 world for which surveillance data is still missing, either due to lack of resources or absence of a pathogen of  
256 interest. In contrast, for regions rich in historical spatio-temporal and ento-epidemiological data, the index  $P$  may  
257 be a starting point for the development of an early warning system which would be based on real-time input of  
258 climatic variables.

259

260

### Implications for Zika virus in Myanmar

261

Our understanding of Zika virus (ZIKV) epidemiology in Myanmar and other countries of South East Asia (SEA) is incomplete, although there is evidence of continued transmission in the region from serosurveys and occasional viral isolation in residents and travelers to the region [31]–[34]. Such evidence also supports the notion that ZIKV transmission in SEA preceded that of the Americas (2014–2015, [35]) even with an apparently low number of cases and no major epidemics reported. To date, only one imported ZIKV case has been notified by the Myanmar Ministry of Health and Sports (MOHS) [36] and the virus' spatio-temporal potential for transmission in the country is largely unknown. Given that mainland countries of SEA share many of the climatic and eco-demographic factors that dictate positive suitability for *Aedes* mosquitoes, it is reasonable to assume that regions within Myanmar have the potential for epidemic or endemic transmission of ZIKV. Exploiting the fact that transmission seasons of various *Aedes*-born viruses (e.g. DENV, CHIKV, ZIKV) tend to be synced in time in other regions of the world [37], we here discuss and speculate on the ZIKV public health implications of the index P's spatio-temporal patterns found both at the national and subnational levels in Myanmar.

262

263

264

265

266

267

268

269

270

271

272

273

The higher suitability for MBVs in southern Myanmar suggests the south to be a viable route for importation of ZIKV from Thailand. It is known that southern international borders are home to sizeable mobile populations with limited access to healthcare [38]. Introduction of ZIKV through such borders would therefore carry a significant public health burden but would also likely be difficult to detect with a passive surveillance system. Additionally, suitability and DENV counts suggest a path of high transmission potential in the middle of the country, in districts including the 3 major urban centres of Myanmar (Yangon, Naypyitaw and Mandalay). Due to the domestic nature of the mosquito species involved, urban centres are a hallmark for ZIKV transmission and establishment, with attack rates above 60% reported elsewhere [15], [39], [40]. For the city of Yangon, for example, a similar attack rate would result in +3 million cases, and would incur significant health and economic consequences. Public health prevention or mitigation of a starting epidemic therefore calls for active surveillance initiatives that move beyond formal international points of entry (i.e. airports and maritime ports) and urban centres. Detecting early epidemic transmission chains in time for mosquito-control interventions before the wet season may effectively hamper the full potential of ZIKV and prevent high attack rates.

274

275

276

277

278

279

280

281

282

283

284

285

286

Exposure to ZIKV infection during gestation is a major risk factor for development of a variety of neonate neurological complications including microcephaly (MC) [35], [41], [42]. Recent studies have further suggested that the risk of MC is highest for exposure around week 17 of gestation, resulting in a lag of approximately 5 months between ZIKV and MC epidemic peaks [15], [41]–[43]. Based on the estimated time window of peak MBV suitability in Myanmar between June and October, we therefore predict that, in the event of a ZIKV outbreak, an epidemic of MC in the country would occur between November and March. This time window is therefore critical for active MC surveillance to be established in Myanmar. To date, there has been no report of significant increases in MC cases in Myanmar. Caution should be taken in assuming this as evidence for no ZIKV circulation, since in previous epidemics there has also been a lack of reported ZIKV-associated MC cases [44] and it is possible that only one of two existing lineages of the virus is responsible or such clinical manifestations [35], [41], [42], [45].

287

288

289

290

291

292

293

294

295

296

Put together, the estimated spatio-temporal variations in MBV suitability found in this study suggest that in order to decrease mosquito populations before the onset of ZIKV epidemics or prevent potential ZIKV introduction events from the southern region, control initiatives should take place just before, and at the beginning of, the wet season. Special attention could also potentially be stratified across districts or states in the middle of the country, including the major urban centres, and in particular in the south, as these regions are likely to have higher transmission potential.

297

298

299

300

301

302

### Limitations and future work

303

There are certain limitations to our approach. We note that the unavailability of high resolution climatic data meant that (1) it was impossible to estimate suitability along the border with China and Laos, two countries in

304



305 which DENV transmission is reported to be endemic; and (2) that weather stations had to be used for vast  
306 geographical ranges, limiting our capacity to explore potentially relevant spatial heterogeneities within the larger  
307 districts. The climatic data used was also limited to 2 years, and although we show that the index P in that period  
308 explains much of DENV's epidemiology in 1996-2001, it is uncertain to what degree our estimations could have  
309 been better with matching time periods. It should also be noted that we take care in not interpreting  $P > 1$  as a  
310 critical threshold for transmission potential. The real epidemic thresholds ( $R_0 > 1$ ,  $R_e > 1$ ) are dependent on the total  
311 number of female mosquitoes per human ( $M = NV/NH$ ) which is largely unknown in time and space. In this context,  
312 our sensitivity analysis in Figure 2D helps to elucidate this and can be of use for other regions for which climatic  
313 variables are available. Another climatic data source that could be investigated in future is satellite remote  
314 sensing, although we did not use this for the present study. We also discuss the implications for ZIKV transmission  
315 in Myanmar, although our results are based on DENV epidemiological data. Given that no seroprevalence or  
316 epidemiological data exists for ZIKV in Myanmar, our discussion points are intended to inform the community to  
317 the best of our knowledge, but should be taken as speculative until new data is made available and compared to  
318 our current projections. Our approach also does not include demographic factors, why may affect both the human  
319 susceptibility and the vector carrying capacity. Although our index P can explain much of the spatio-temporal  
320 patterns of Myanmar, it is possible that these factors explain some of the missed spatial patterns (e.g. local vector  
321 capacity could be higher in regions with more cases than predicted by P).

### 322 Ento-epidemiological count data

323 DENV case counts for Myanmar between 1996 and 2001 (as published by [12]) were published already aggregated  
324 at the level of the country and by month. Naing et al. reported that the original source of the case counts was the  
325 official annual reports of the Myanmar National Vector-Borne Disease Control programme (VBDC). Cases included  
326 total suspected reports of dengue fever (DF) and dengue haemorrhagic fever (DHF). The absolute counts, per  
327 month (Jan-Dec) were: 20, 35, 40, 43, 139, 333, 487, 255, 258, 261, 80, 82 (year 1996); 67, 68, 37, 55, 140, 724,  
328 876, 877, 545, 430, 248, 150 (year 1997); 131, 144, 208, 271, 714, 2511, 2904, 2455, 1528, 1163, 747, 249 (year  
329 1998); 45, 105, 164, 91, 445, 1309, 1533, 968, 533, 247, 92, 102 (year 1999); 32, 29, 26, 90, 120, 333, 164, 95, 59,  
330 73, 71, 84 (year 2000); 16, 29, 576, 1190, 2137, 2868, 3082, 2346, 1476, 990, 354, 51 (year 2001).

331 DENV counts at the level of Myanmar's states for the year 2015 were used, as reported by the Ministry of Health  
332 and Sports [30]. Incidence per 100k individuals per state were: Sagaing 125, Ayeyarwady 105, Mandalay 106, Mon  
333 259, Yangon 63, Bago 68, Tanintharyi 145, Naypyitaw 163, Shan 50, Kayin 108, Magway 35, Kachin 61, Rakhine 28,  
334 Kayah 102, Chin 18.

335 Data collected in a study of *Aedes aegypti* abundance in Yangon over the year of 2011 was also used [29] From  
336 this publication we used the number of major breeding containers found in Yangon per month (Jan-Dec): 110, 102,  
337 58, 51, 109, 249, 257, 276, 258, 248, 252, 170.

### 338 Spatial and climatic data

339 The administrative distribution of Myanmar into districts was suitable for our analysis, since it was possible to  
340 classify them by predominant weather conditions, using the Köppen-Geiger classification [46]: equatorial  
341 monsoonal (Am), equatorial winter dry (Aw), warm temperate-winter dry-hot summer (Cwa), warm temperate-  
342 winter dry-warm summer (Cwb) and arid steppe-hot arid (BSh). We obtained climate data from the United States  
343 National Oceanic and Atmospheric Administration webpage [47], which had incomplete observations that we then  
344 complemented with information from the Department of Meteorology and Hydrology, Yangon, for the period  
345 2015-2016. Time and resource constrains for this process of data collection allowed for retrieving data from 14  
346 weather stations, which were representative of the following districts: Pathein station, for the districts of Pathein,  
347 Pyapon, Maubin, Myaungmya and Labutta; Hpa An station, for Hpa An, Myawaddy, Kawkareik, Mawlamyine and  
348 Thaton; Sittwe station, for Sittwe, Marauk-U and Maungdaw; Dawei station, for Dawei, Myeik, and Kawthoung;  
349 Yangon Airport station, for North, South, East and West Yangon; Bago station for Bago, Hpapun and Hinthada; Nay  
350 Pyi Taw Airport station for North and South Nay Pyi Taw, Yamethin and Magway; Loikaw station for Loikaw,  
351 Bawlake and Langkho; Katha station for Katha, Bhamo and Mohnyin; Hkamti station for Hkamti district only;

352 Taunggyi station for Taunggyi and Loilen; Mandalay Airport station for Mandalay, Kyaukse, Miyngyan, Nyaung-U  
353 and Meiktila; an average of the weather conditions in the Am region, for the districts of Kyaukpyu and Thandwe);  
354 and an average of the weather conditions in the Aw region, for the districts of Minbu, Pakokku, Gangaw,  
355 Pyinoolwin, Sagaing, Shwebo, Monywa, Kale, Yinmabin and Kyaukme.

356 To include a district in the present analysis, we used the criteria that its main population settlements were below  
357 1500 meters above sea level, since the entomological modelling system we employed does not account for the  
358 effect of elevation on vector ecology and higher altitudes are less favourable to mosquito survival, plus either of  
359 the following: having access to climate variables from its weather station; or that its central point was within 100  
360 Km of a station from which climate information was available; or being situated within a weather region where  
361 climate could be extrapolated from other districts' stations. The latter was done since an analysis of variance  
362 showed no difference in mean temperature across weather stations in the Am (F=0.391, p-value=0.53; Dawei, Hpa  
363 An, Yangon, Pathein and Sittwe, and Bago stations) and Aw regions (F=2.793, p-value=0.09; Taungoo, Loikaw and  
364 Nay Pyi Taw stations). Extrapolation was not done for districts within the Cwa region, as there was a statistically  
365 significant difference in weather observations from individual stations (F=12.03, p-value<0.05; Hkamti, Katha nad  
366 Taunggyi stations). Lastly, Mandalay was a single station within the BSh region and Hakha station from the Cwb  
367 region was removed from analysis, due to elevation criteria.

368 The three weather seasons defined in this study for the context of Myanmar were: cool dry season, from  
369 November to February, hot dry season, from March to May, and wet (monsoon) season, from June to October.  
370 National means (standard deviations) of yearly and cool, hot and wet season were, correspondingly: temperature  
371 in degrees Celsius 27.1 (2.8), 26.7 (1.5), 28.8 (1.3), and 27.7 (1.4); percent humidity 77.9 (11.1), 79.9 (5.3), 64.5  
372 (5.8), 85.3 (6.7); and inches of rainfall 0.17 (0.43), 0.03 (0.13), 0.01 (0.05) and 0.47 (0.62).

### 373 **Parameters specific to Myanmar**

374 As detailed in the main text, unknown parameters  $\alpha$ ,  $\rho$  and  $\eta$  were obtained for each weather station using a  
375 parameter sweep with heuristics of adult mosquito life-span of ~9 days and extrinsic incubation period of ~ 5 days  
376 (over the period 2015-2016). See Methods for details. The obtained values for  $\alpha$ ,  $\rho$  and  $\eta$  per weather station  
377 were (in order): Pathein 1.414, 0.78, 2.241; Hpa An 1.414, 0.78, 2.241; Sittwe 1.552, 0.45, 2.517; Dawei 1.414,  
378 0.56, 2.517; Yangon 1.552, 0.78, 2.241; Am 1.414, 0.78, 2.379; Bago 1.414, 0.67, 2.379; Nay Pyi Taw 1.552, 0.45,  
379 2.517; Loikaw 1.966, 0.45, 2.379; Aw 1.552, 0.78, 2.241; Katha 1.689, 0.56, 2.379; Hkamti 1.828, 1.00, 1.828;  
380 Taunggyi 1.828, 0.78, 1.828; Mandalay 1.552, 0.23, 2.655.

381 The districts found to have yearly mean index  $P>1$  were: Magway, Nay Pyi Taw north, Nay Pyi Taw south, Yamethin,  
382 Bhamo, Katha, Mohnyin, Dawei, Kawthoung, Myeik, Maungdaw, Mrauk-U, Sittwe, Bago, Hinthada, Hpapun,  
383 Hkamti, Hpa-An, Kawkareik, Mawlamyine, Myawaddy, Thaton (with no particular order).

### 384 **Funding**

385 PNPG received travel and accommodation expenses from the Department of Global Health and Oriel College,  
386 University of Oxford. The Medical Action Myanmar (MAM) provided funding for purchasing the weather data from  
387 the Department of Meteorology and Hydrology. JL received funding from the European Research Council under  
388 the European Union's Seventh Framework Programme (FP7/2007-2013)/ERC grant agreement no. 268904 -  
389 DIVERSITY. UO received an EMBO postdoctoral fellowship. The Myanmar Oxford Clinical Research Unit is part of  
390 the MORU Tropical Health Network, funded by the Wellcome Trust. RJM receives funding from Asian Development  
391 Bank and the Bill and Melinda Gates Foundation. Mahidol-Oxford Tropical Medicine Research Unit is funded by  
392 the Wellcome Trust of Great Britain. The funders had no role in study design, data collection and analysis, decision  
393 to publish, or preparation of the manuscript.

### 394 **Competing Interest Statement**

395 Authors declare no competing interests.

396

## References

- 397 [1] T. Jaenisch *et al.*, “Dengue Expansion in Africa—Not Recognized or Not Happening?,” *Emerg. Infect.*  
398 *Dis.*, vol. 20, no. 10, Oct. 2014.
- 399 [2] J. D. Stanaway *et al.*, “The global burden of dengue: an analysis from the Global Burden of Disease  
400 Study 2013,” *Lancet Infect. Dis.*, vol. 16, no. 6, pp. 712–723, 2016.
- 401 [3] N. G. Schwarz *et al.*, “Seroprevalence of antibodies against Chikungunya, Dengue, and Rift Valley fever  
402 viruses after febrile illness outbreak, Madagascar,” *Emerg. Infect. Dis.*, vol. 18, no. 11, pp. 1780–1786,  
403 Nov. 2012.
- 404 [4] L. C. C. Monteiro, J. R. B. de Souza, and C. M. R. de Albuquerque, “Eclosion rate, development and  
405 survivorship of *Aedes albopictus* (Skuse)(Diptera: Culicidae) under different water temperatures,”  
406 *Neotrop. Entomol.*, vol. 36, no. 6, pp. 966–971, 2007.
- 407 [5] M.-J. Chen, C.-Y. Lin, Y.-T. Wu, P.-C. Wu, S.-C. Lung, and H.-J. Su, “Effects of extreme precipitation to the  
408 distribution of infectious diseases in Taiwan, 1994–2008,” *PLoS One*, vol. 7, no. 6, p. e34651, 2012.
- 409 [6] C. R. Williams, C. a Bader, M. R. Kearney, S. a Ritchie, and R. C. Russell, “The extinction of dengue  
410 through natural vulnerability of its vectors,” *PLoS Negl. Trop. Dis.*, vol. 4, no. 12, p. e922, Jan. 2010.
- 411 [7] S. Lozano-Fuentes *et al.*, “The dengue virus mosquito vector *Aedes aegypti* at high elevation in  
412 Mexico,” *Am. J. Trop. Med. Hyg.*, vol. 87, no. 5, pp. 902–909, Nov. 2012.
- 413 [8] A. Nisalak *et al.*, “Serotype-specific dengue virus circulation and dengue disease in Bangkok, Thailand  
414 from 1973 to 1999,” *Am. J. Trop. Med. Hyg.*, vol. 68, no. 2, pp. 191–202, Mar. 2003.
- 415 [9] T. A. Wartel *et al.*, “Three Decades of Dengue Surveillance in Five Highly Endemic South East Asian  
416 Countries,” *Asia-Pacific J. public Heal.*, vol. 29, no. 1, pp. 7–16, Jan. 2017.
- 417 [10] H. M. Thu *et al.*, “Myanmar Dengue Outbreak Associated with Displacement of Serotypes 2, 3, and 4  
418 by Dengue 1,” *Emerg. Infect. Dis.*, vol. 10, no. 4, pp. 593–597, Apr. 2004.
- 419 [11] Cho-Min-Naing, “Assessment of dengue hemorrhagic fever in Myanmar,” *Southeast Asian J. Trop.*  
420 *Med. Public Health*, vol. 31, no. 4, pp. 636–641, 2000.
- 421 [12] C.-M. Naing, S. Lertmaharit, and K.-S. Naing, “Time-Series Analysis of Dengue Fever/Dengue  
422 Haemorrhagic Fever in Myanmar since 1991,” *Dengue Bull. (WHO Reg. Off. South-East Asia)*, vol. 26,  
423 pp. 24–32, 2002.
- 424 [13] J. Lourenco and M. Recker, “The 2012 Madeira dengue outbreak: epidemiological determinants and  
425 future epidemic potential,” *Clim. / R0*, vol. 8, no. 8, p. e3083, Aug. 2014.
- 426 [14] N. R. Faria *et al.*, “Genomic and epidemiological characterisation of a dengue virus outbreak among  
427 blood donors in Brazil,” *Sci. Rep.*, vol. 7, no. 1, 2017.
- 428 [15] J. Lourenço *et al.*, “Epidemiological and ecological determinants of Zika virus transmission in an urban  
429 setting,” *Elife*, vol. 6, Sep. 2017.
- 430 [16] A. Hamlet *et al.*, “The seasonal influence of climate and environment on yellow fever transmission  
431 across Africa,” *PLoS Negl. Trop. Dis.*, vol. 12, no. 3, p. e0006284, Mar. 2018.

- 432 [17] L. M. Gardner, A. Bóta, K. Gangavarapu, M. U. G. Kraemer, and N. D. Grubaugh, "Inferring the risk  
433 factors behind the geographical spread and transmission of Zika in the Americas," *PLoS Negl. Trop.*  
434 *Dis.*, vol. 12, no. 1, p. e0006194, Jan. 2018.
- 435 [18] M. U. G. Kraemer *et al.*, "Big city, small world: density, contact rates, and transmission of dengue  
436 across Pakistan.," *J. R. Soc. Interface*, vol. 12, no. 111, p. 20150468, Oct. 2015.
- 437 [19] M. U. G. Kraemer *et al.*, "The global compendium of *Aedes aegypti* and *Ae. albopictus* occurrence.,"  
438 *Sci. data*, vol. 2, p. 150035, 2015.
- 439 [20] H. M. Yang, M. L. G. Macoris, K. C. Galvani, M. T. M. Andrighetti, and D. M. V Wanderley, "Assessing  
440 the effects of temperature on the population of *Aedes aegypti*, the vector of dengue.," *Epidemiol.*  
441 *Infect.*, vol. 137, no. 8, pp. 1188–202, Aug. 2009.
- 442 [21] O. J. Brady *et al.*, "Modelling adult *Aedes aegypti* and *Aedes albopictus* survival at different  
443 temperatures in laboratory and field settings.," *Parasit. Vectors*, vol. 6, no. 1, p. 351, Jan. 2013.
- 444 [22] M. Trpis and W. Hausermann, "Dispersal and other population parameters of *Aedes aegypti* in an  
445 African village and their possible significance in epidemiology of vector-borne diseases," *Am. J. Trop.*  
446 *Med. Hyg.*, vol. 35, no. 6, pp. 1263–1279, 1986.
- 447 [23] M. Trpis and W. Hausermann, "Population Size, Dispersal, and Longevity of Domestic *Aedes aegypti*  
448 *aegypti* (Diptera: Culicidae) by Mark-Release-Recapture in the Village of Shauri Moyo in Eastern  
449 Kenya," *J. Med.*, vol. 32, no. 1, p. 27–33(7), 1995.
- 450 [24] L. E. Hugo *et al.*, "Adult survivorship of the dengue mosquito *Aedes aegypti* varies seasonally in central  
451 Vietnam.," *PLoS Negl. Trop. Dis.*, vol. 8, no. 2, p. e2669, Feb. 2014.
- 452 [25] T. Spoorenberg, "Demographic Changes in Myanmar since 1983: An Examination of Official Data,"  
453 *Popul. Dev. Rev.*, vol. 39, no. 2, pp. 309–324, Jun. 2013.
- 454 [26] P. Dutta, S. A. Khan, A. M. Khan, C. K. Sharma, and J. Mahanta, "Survey of mosquito species in  
455 Nagaland , a hilly state of north east region of India," vol. 31, no. September, pp. 781–785, 2010.
- 456 [27] N. Kwansomboon, V. Chaumeau, P. Kittiphanakun, D. Cerqueira, V. Corbel, and T. Chareonviriyaphap,  
457 "Vector bionomics and malaria transmission along the Thailand-Myanmar border: a baseline  
458 entomological survey," *J. Vector Ecol.*, vol. 42, no. 1, pp. 84–93, 2017.
- 459 [28] Y. Wang *et al.*, "Population dynamics and community structure of *Anopheles* mosquitoes along the  
460 China-Myanmar border," *Parasit. Vectors*, vol. 8, no. 1, p. 445, 2015.
- 461 [29] T. T. Oo, V. Storch, M. B. Madon, and N. Becker, "Factors influencing the seasonal abundance of *Aedes*  
462 (*Stegomyia*) *aegypti* and the control strategy of dengue and dengue haemorrhagic fever in Thanlyin  
463 Township, Yangon City, Myanmar.," *Trop. Biomed.*, vol. 28, no. 2, pp. 302–11, Aug. 2011.
- 464 [30] "Vector Borne Disease Control Programme Ministry of Health and Sports The Union of Republic of  
465 Myanmar - Ministry of Health and Sports," 2016. [Online]. Available: <https://goo.gl/nzodH0>.
- 466 [31] W. L. Pond, "Arthropod-borne virus antibodies in sera from residents of South-East Asia," *Trans. R.*  
467 *Soc. Trop. Med. Hyg.*, vol. 57, no. 5, pp. 364–371, Sep. 1963.

- 468 [32] J. G. Olson, T. G. Ksiazek, Suhandiman, and Triwibowo, "Zika virus, a cause of fever in Central Java,  
469 Indonesia.," *Trans. R. Soc. Trop. Med. Hyg.*, vol. 75, no. 3, pp. 389–93, 1981.
- 470 [33] R. Buathong *et al.*, "Detection of Zika Virus Infection in Thailand, 2012-2014.," *Am. J. Trop. Med. Hyg.*,  
471 vol. 93, no. 2, pp. 380–3, Aug. 2015.
- 472 [34] K. Fonseca *et al.*, "First case of Zika virus infection in a returning Canadian traveler.," *Am. J. Trop. Med.*  
473 *Hyg.*, vol. 91, no. 5, pp. 1035–8, Nov. 2014.
- 474 [35] N. R. Faria *et al.*, "Establishment and cryptic transmission of Zika virus in Brazil and the Americas,"  
475 *Nature*, vol. 546, no. 7658, pp. 406–410, May 2017.
- 476 [36] World Health Organisation, "First case of Zika Virus infection detected in Myanmar; mosquito control  
477 measures must be at the forefront of the fight against vectorborne diseases.," 2016. [Online].  
478 Available: [http://www.searo.who.int/myanmar/areas/zika\\_firstcaseinmyanmar/en/](http://www.searo.who.int/myanmar/areas/zika_firstcaseinmyanmar/en/).
- 479 [37] N. R. Faria, J. Lourenço, E. Marques de Cerqueira, M. Maia de Lima, and L. Carlos Junior Alcantara,  
480 "Epidemiology of Chikungunya Virus in Bahia, Brazil, 2014-2015," *PLoS Curr.*, Feb. 2016.
- 481 [38] A. D. Bank, "Greater Mekong Subregion Health Security Project." [Online]. Available:  
482 <http://www.adb.org/Documents/RRPs/?id=48118-002-3>.
- 483 [39] N. M. Ferguson *et al.*, "Countering the Zika epidemic in Latin America.," *Science (80-. )*, vol. 353, no.  
484 6297, pp. 353–354, 2016.
- 485 [40] E. M. Netto *et al.*, "High Zika Virus Seroprevalence in Salvador, Northeastern Brazil Limits the Potential  
486 for Further Outbreaks.," *MBio*, vol. 8, no. 6, Nov. 2017.
- 487 [41] N. R. Faria *et al.*, "Zika virus in the Americas: Early epidemiological and genetic findings.," *Science*, vol.  
488 352, no. 6283, p. aaf5036, 2016.
- 489 [42] M. A. Johansson, L. Mier-y-Teran-Romero, J. Reefhuis, S. M. Gilboa, and S. L. Hills, "Zika and the Risk of  
490 Microcephaly," *N. Engl. J. Med.*, vol. 375, no. 1, pp. 1–4, Jul. 2016.
- 491 [43] S. Cauchemez *et al.*, "Association between Zika virus and microcephaly in French Polynesia, 2013-15:  
492 A retrospective study," *Lancet*, vol. 387, no. 10033, pp. 2125–2132, 2016.
- 493 [44] J. L. Kool *et al.*, "Duffy Zika virus outbreak on Yap Island, Federated States of Micronesia NEJM 2008,"  
494 pp. 2536–2543, 2015.
- 495 [45] J. Lourenço, M. de Lourdes Monteiro, T. Valdez, J. Monteiro Rodrigues, O. Pybus, and N. Rodrigues  
496 Faria, "Epidemiology of the Zika Virus Outbreak in the Cabo Verde Islands, West Africa.," *PLoS Curr.*,  
497 vol. 10, Mar. 2018.
- 498 [46] M. C. Peel, B. L. Finlayson, and T. A. McMahon, "Updated world map of the Köppen-Geiger climate  
499 classification," *Hydrol. Earth Syst. Sci.*, vol. 11, no. 5, pp. 1633–1644, 2007.
- 500 [47] N. O. and A. Administration., "NNDC climate data online." [Online]. Available:  
501 <https://www7.ncdc.noaa.gov/CDO/cdoselect.cmd?datasetabbv=GSOD&countryabbv=&georegionabbv=>.
- 502
- 503
